# Supplementary material
Source: MDPI journal article supplement (https://www.mdpi.com/2073-4441/15/10/1801)
Supplement: s1 [file s1]

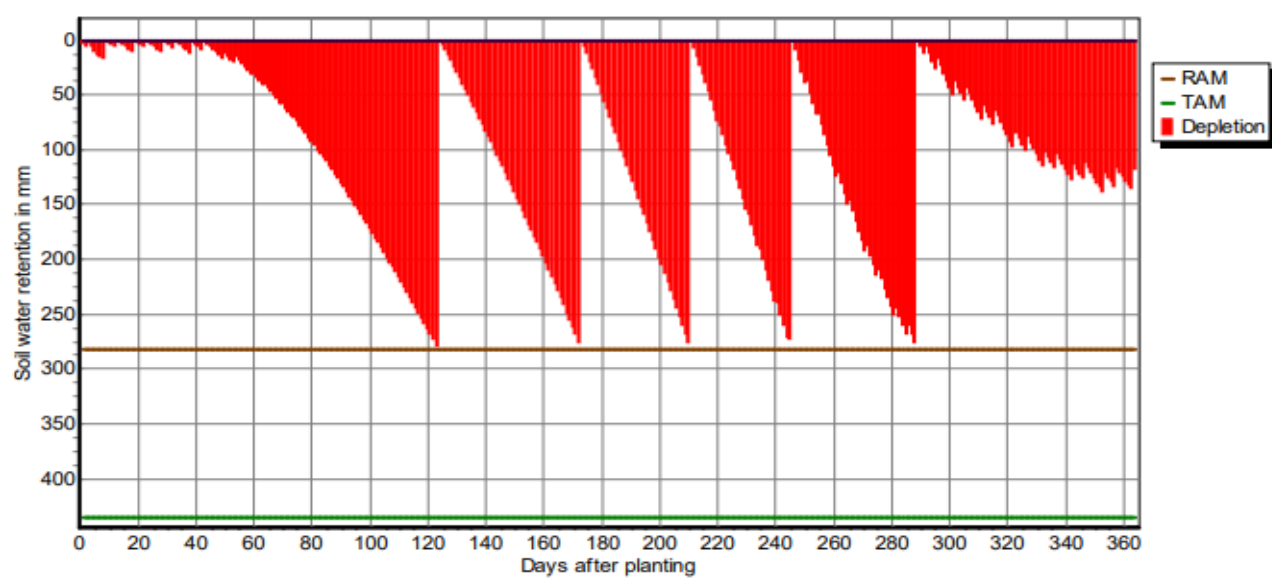

**Figure S1.** Soil water retention – growing length curve for sugarcane

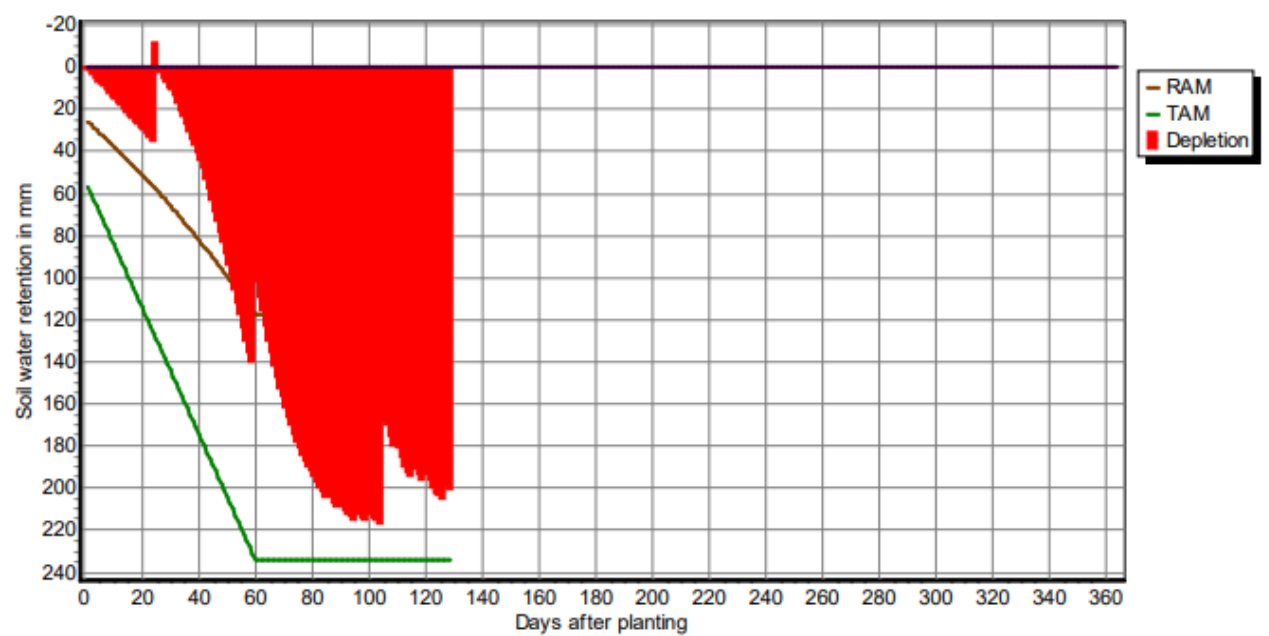

**Figure S2.** Soil water retention – growing length curve for maize

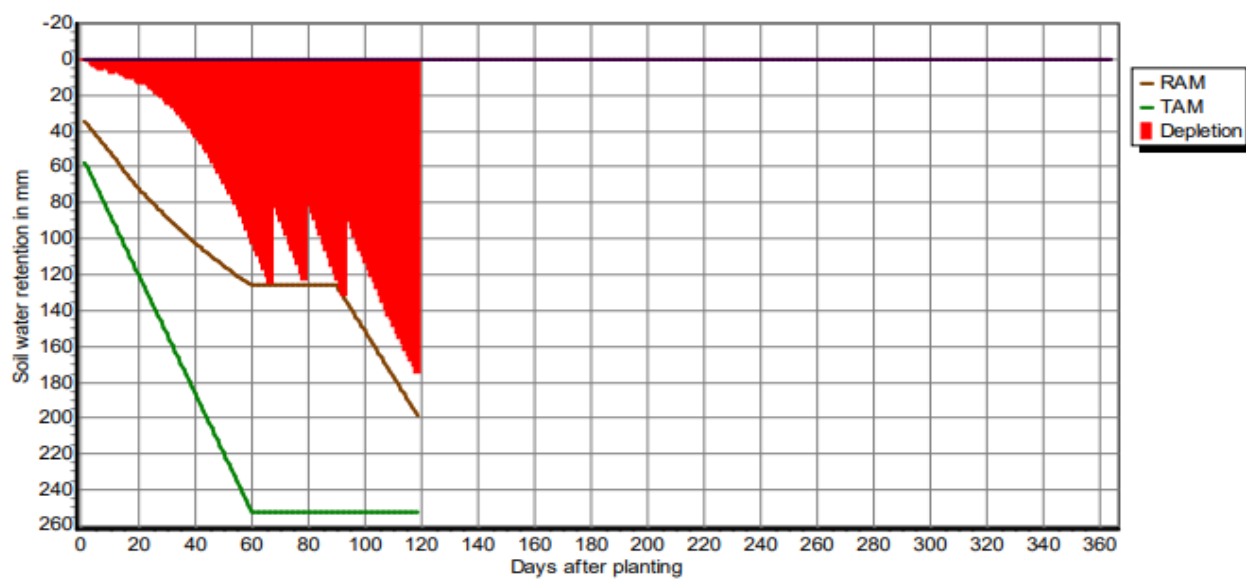

**Figure S3.** Soil water retention – growing length curve for sorghum

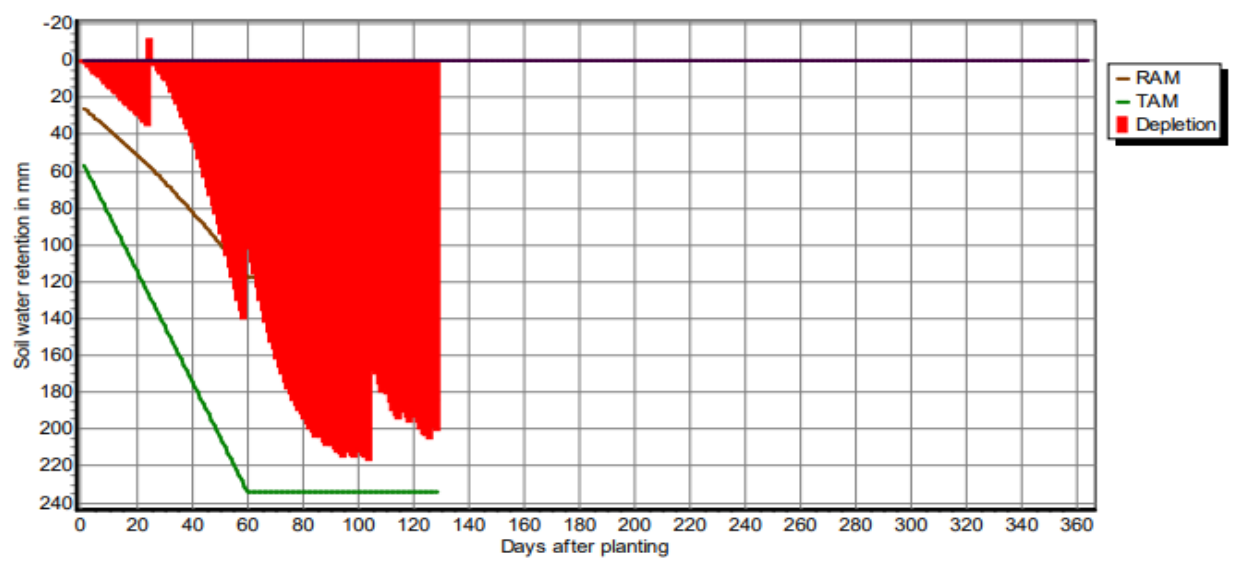

**Figure S4.** Soil water retention – growing length curve for sunflower

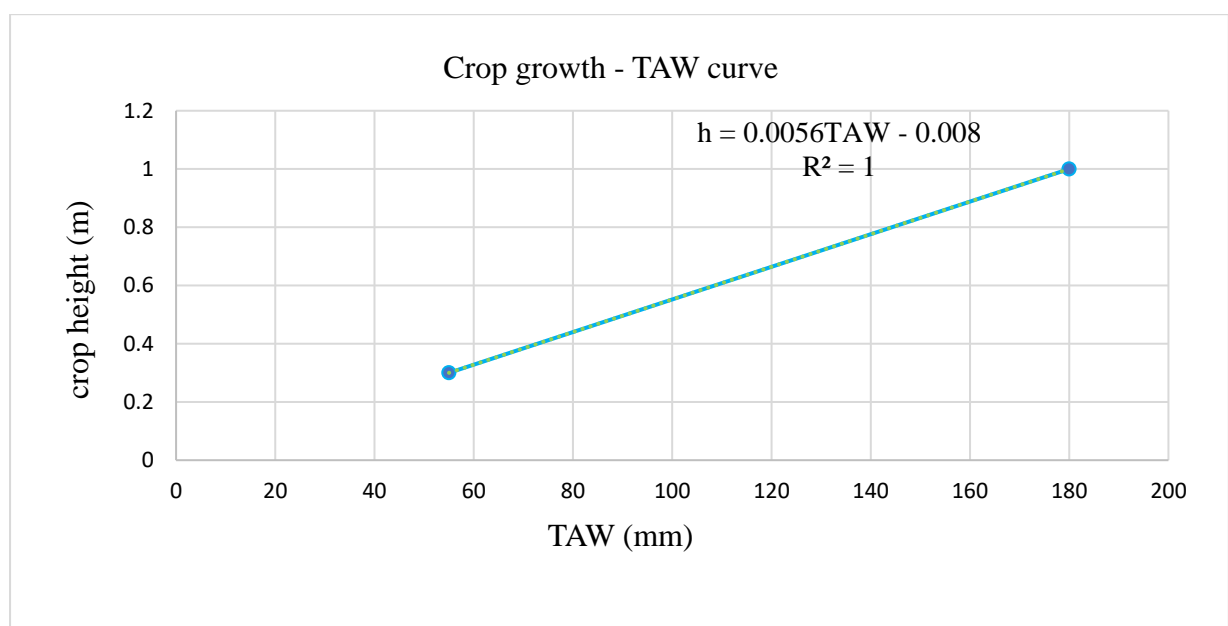

**Figure S5.** Variation of crop height with TAW for maize

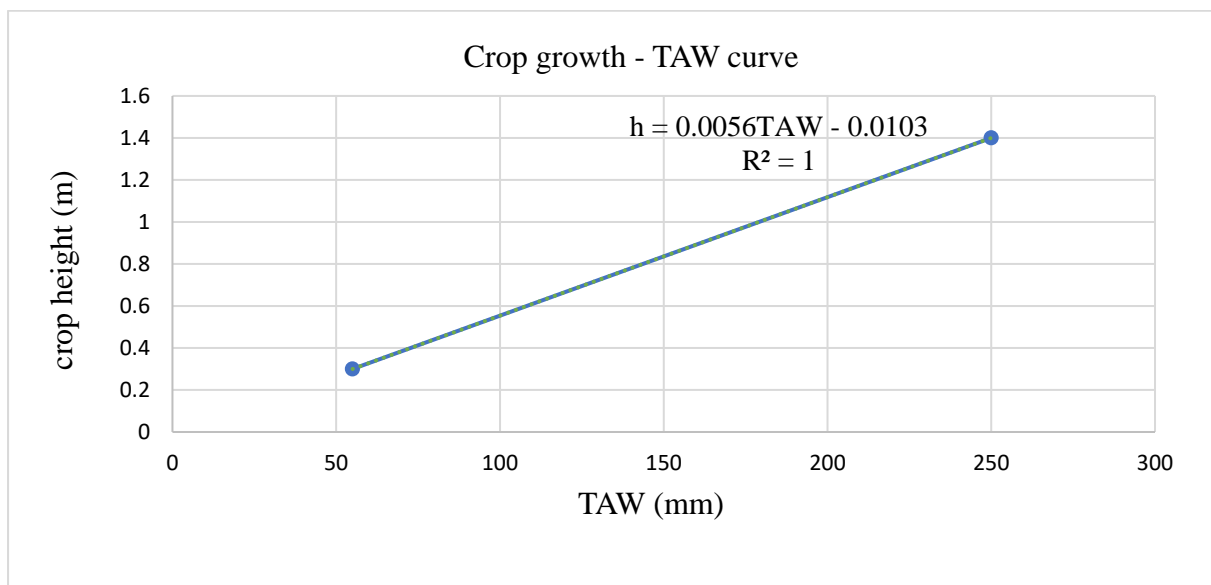

**Figure S6.** Variation of crop height with TAW for sorghum

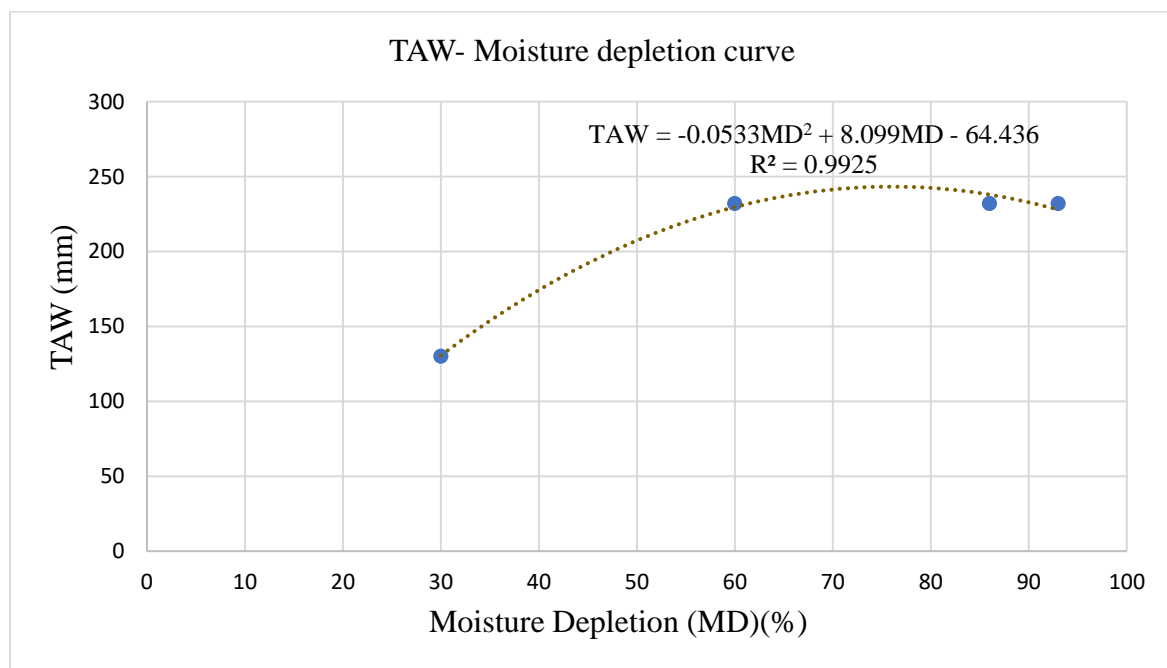

**Figure S7.** Variation of TAW with moisture depletion for sunflower

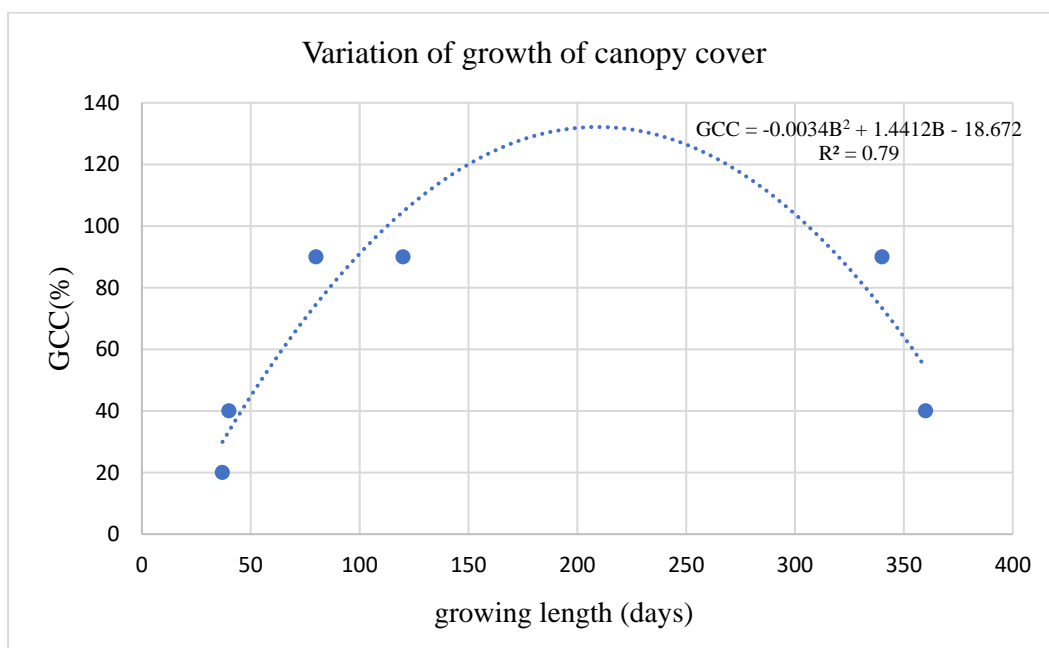

**Figure S8.** Variation of growth of canopy cover with crop growing length for sugarcane



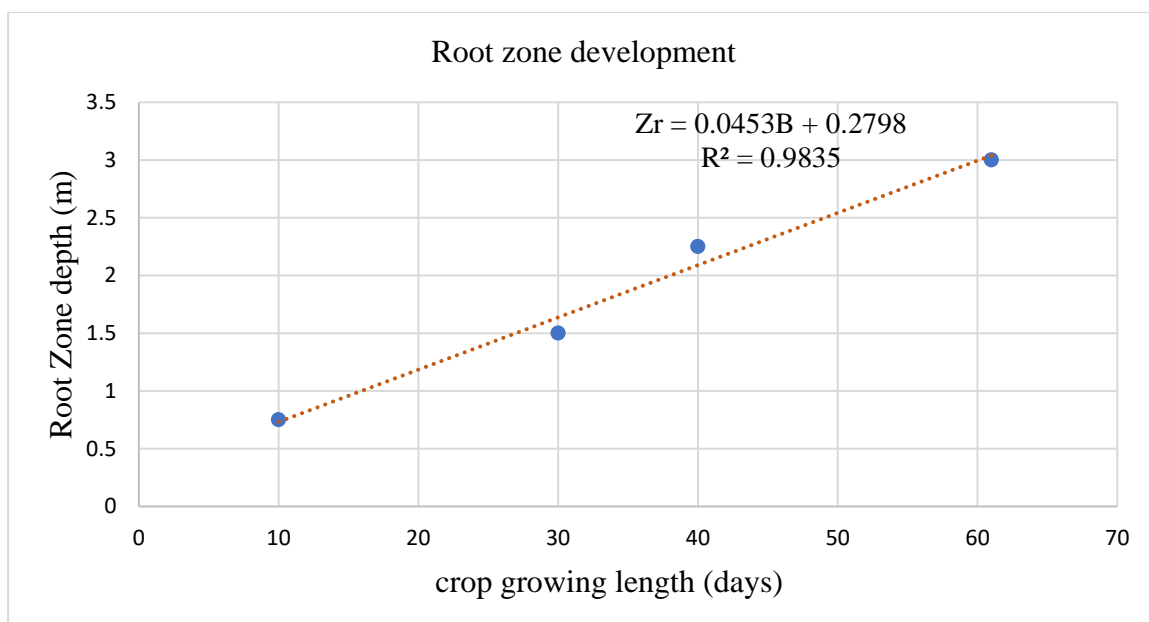

**Figure S9.** Variation of root development with crop growing length for sugarcane

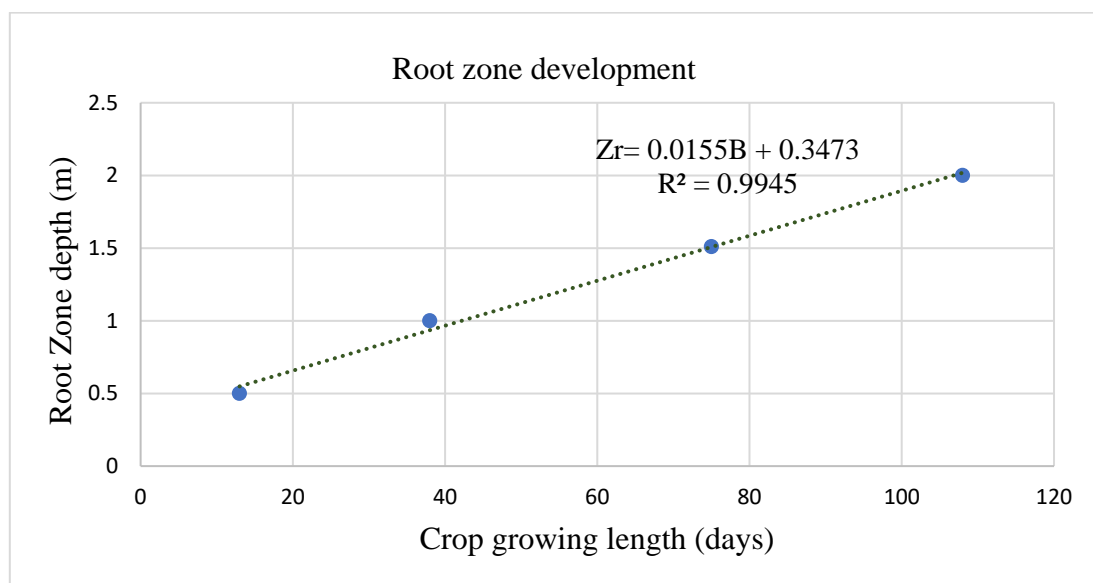

**Figure S10.** Variation of root development with crop growing length for maize

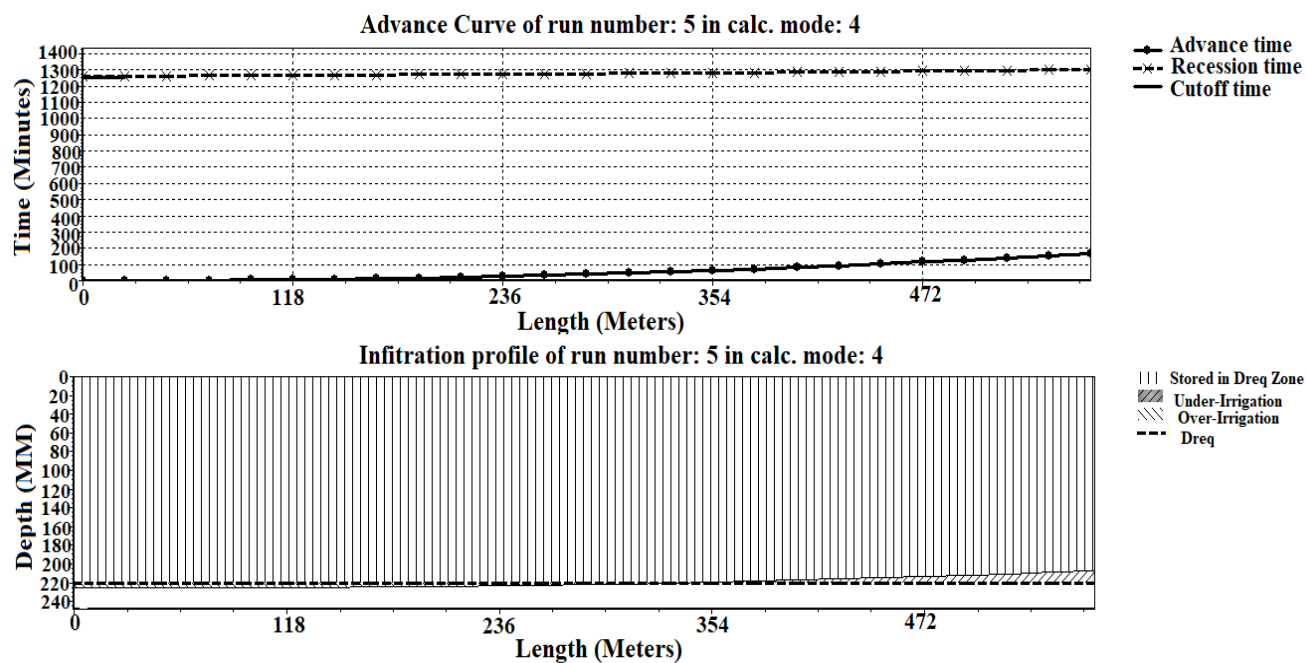

**Figure S11.** Advance curve & Irrigation profile for maize in fixed flow method

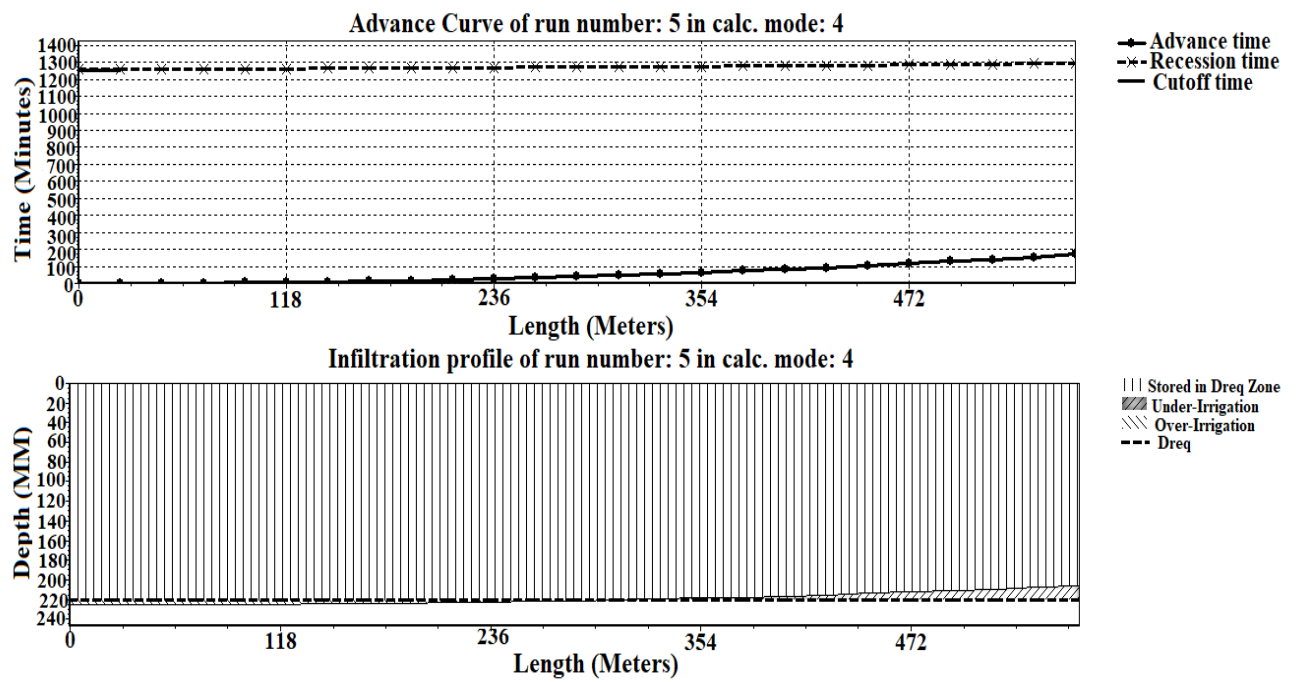

**Figure S12.** Advance curve & Irrigation profile for maize in cutback flow method

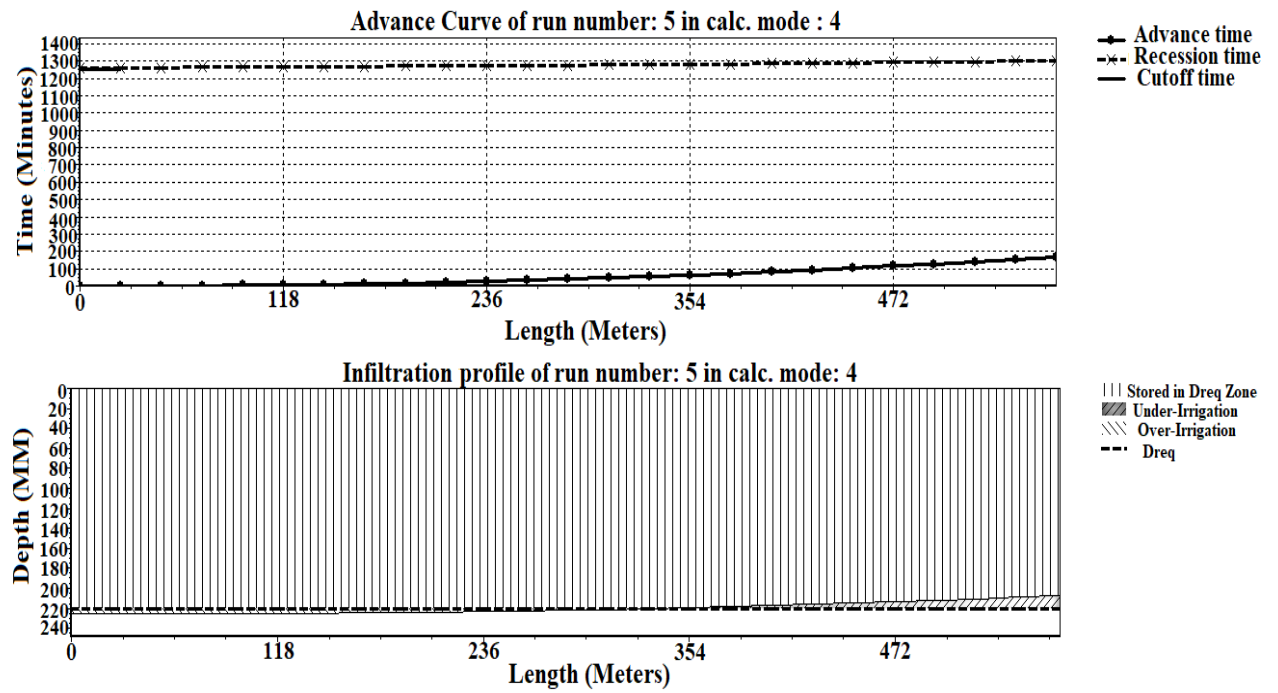

**Figure S13.** Advance curve & Irrigation profile for maize in tailwater reuse method

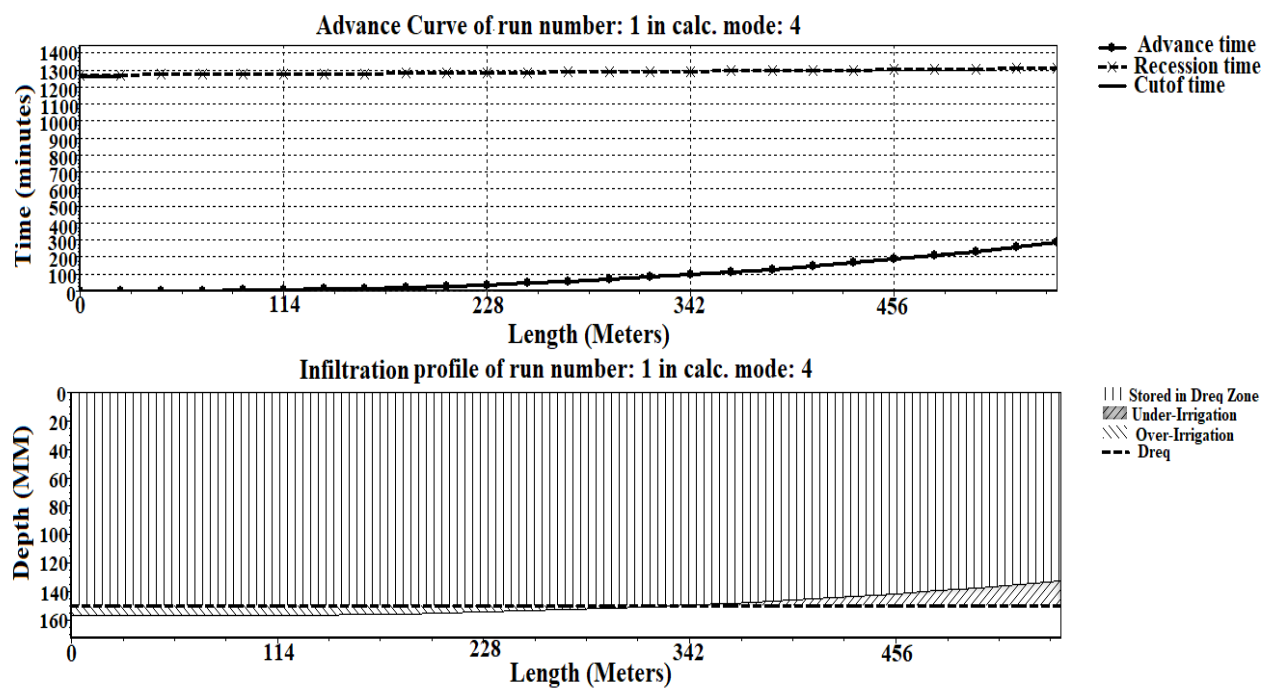

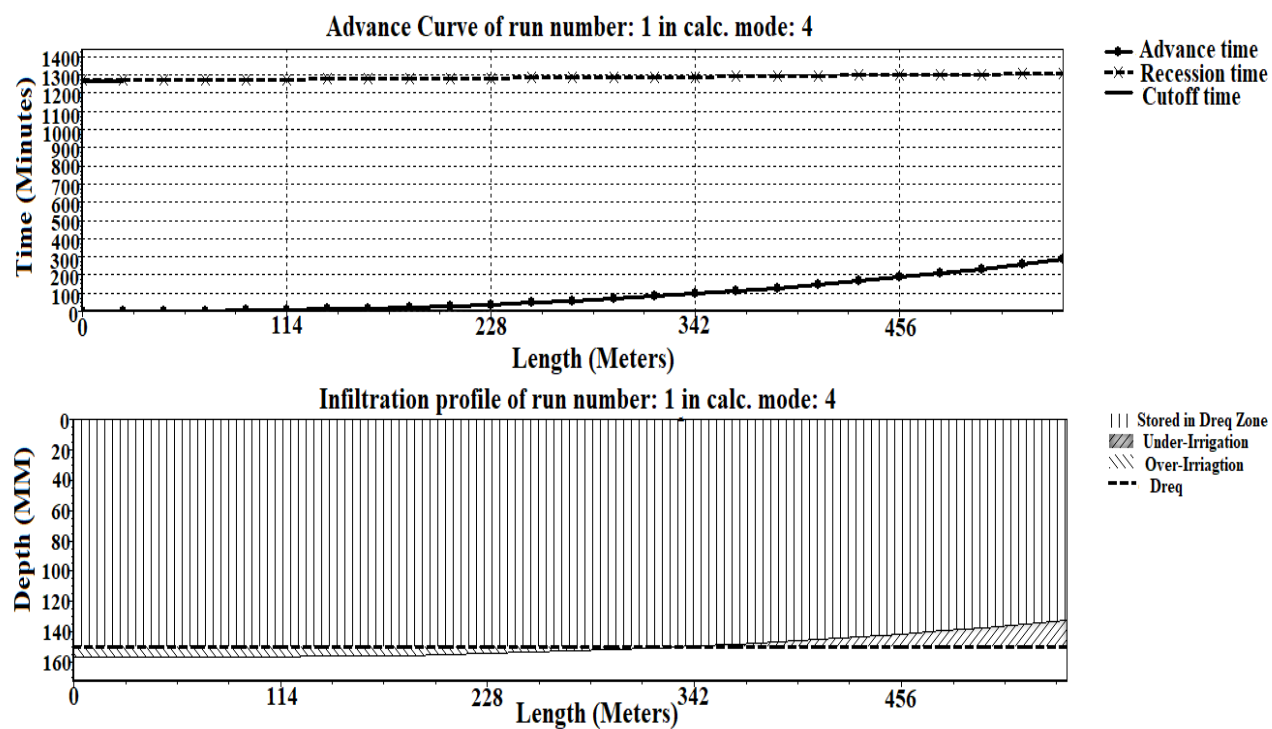

**Figure S15.** Advance curve & Irrigation profile for sorghum in cutback flow method

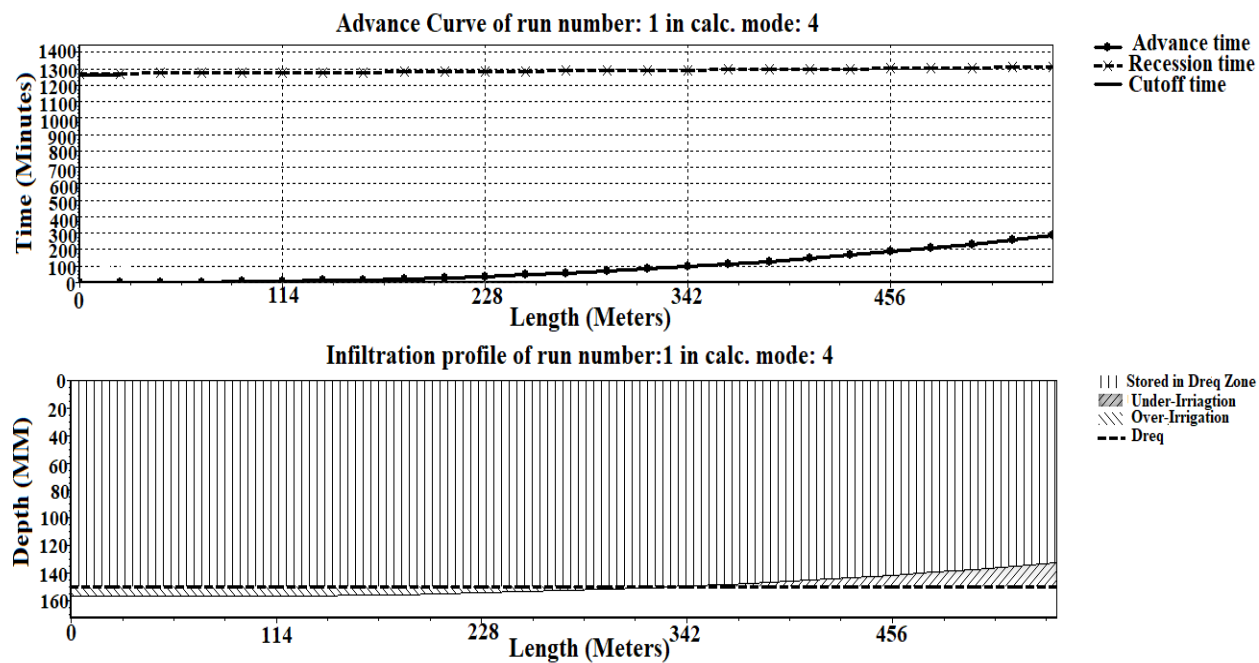

**Figure S16.** Advance curve & Irrigation profile for sorghum in tailwater reuse method



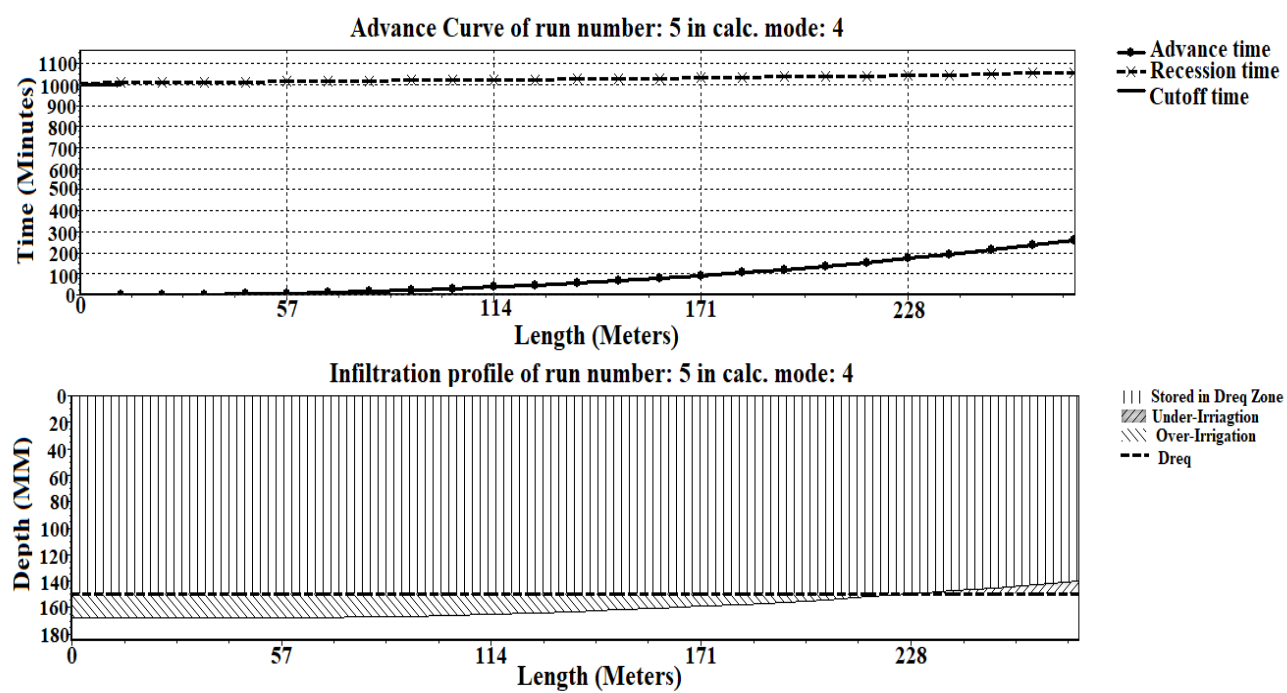

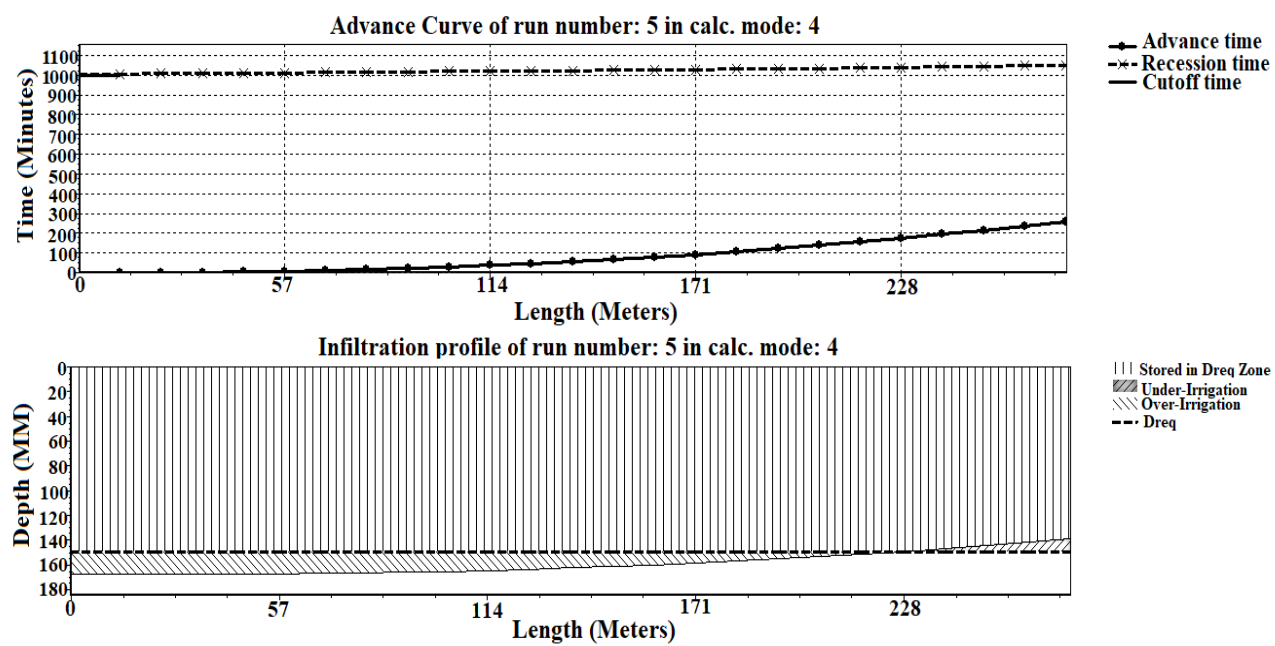

**Figure S18.** Advance curve & Irrigation profile for sunflower in cutback flow method

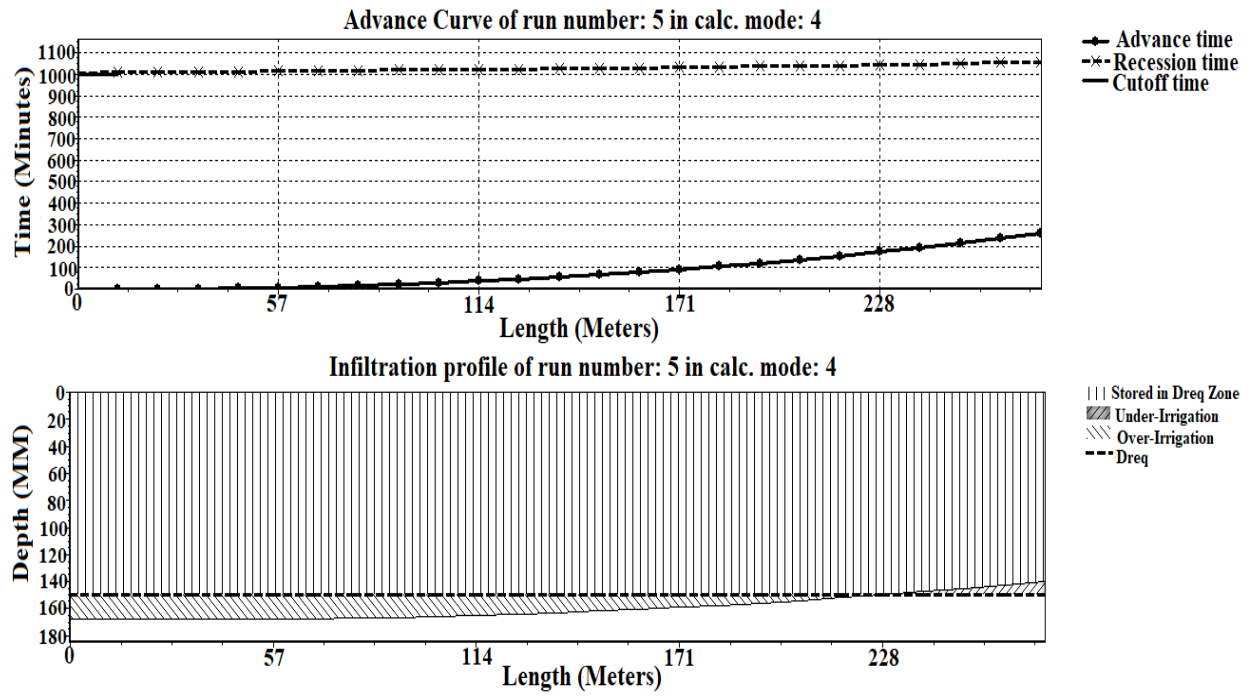

**Figure S19.** Advance curve & Irrigation profile for sunflower in tailwater reuse method

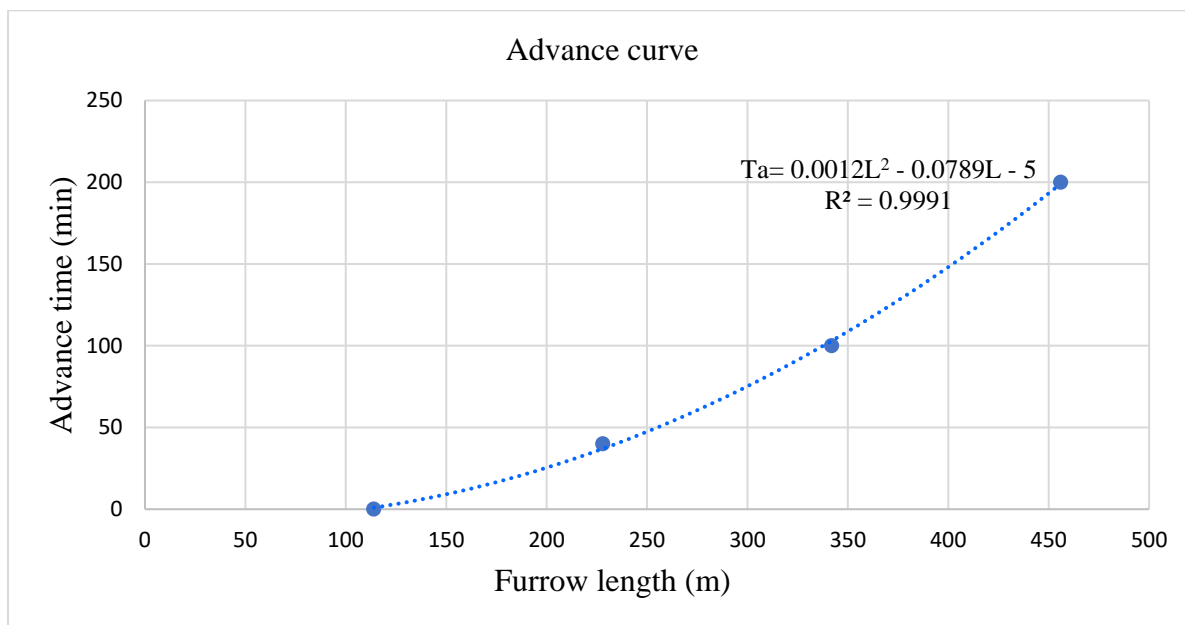

**Figure S20.** Variation of advance time with furrow length for sorghum

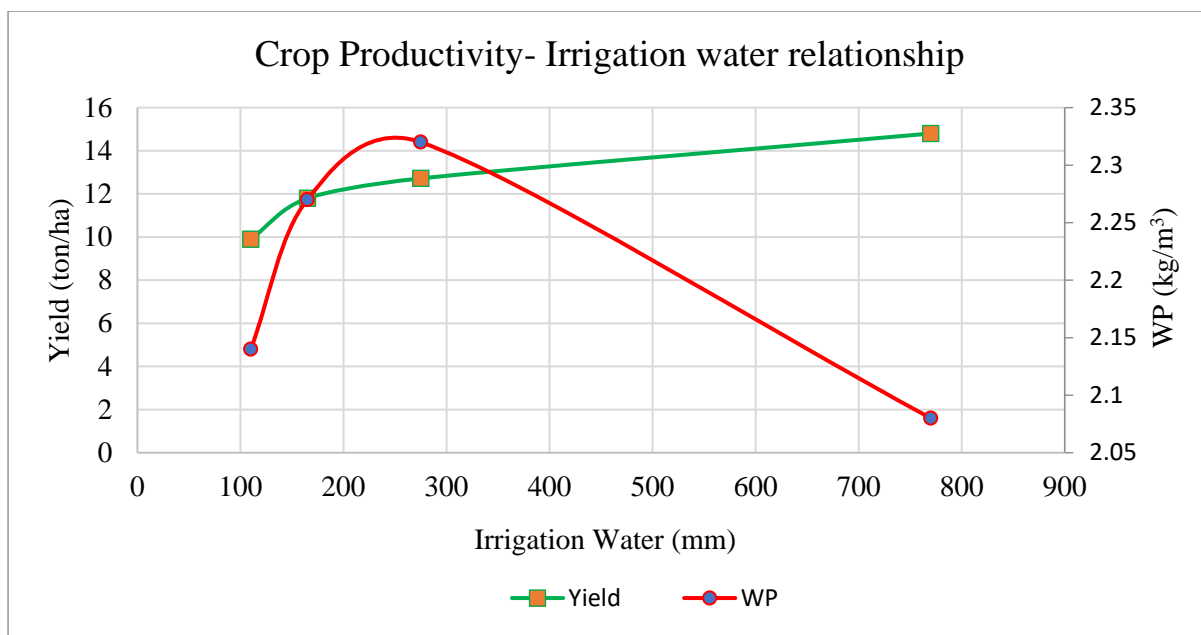

**Figure S21.** Crop productivity -irrigation water relationship for maize

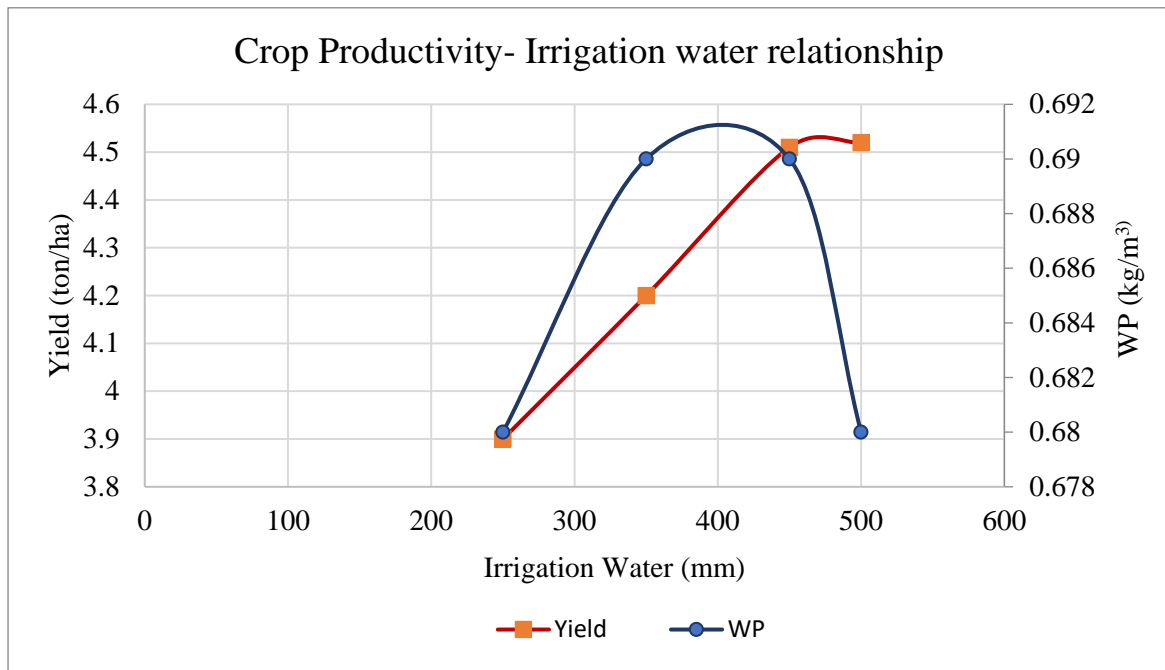

**Figure S22.** Crop productivity -irrigation water relationship for sunflower

**Table S1** Crop Water Requirement for Sugarcane

| <b>Month</b> | <b>Decade</b> | <b>Stage</b> | <b>Kc</b> | <b>ETc</b> | <b>ETc</b> | <b>Eff rain</b> | <b>Irr. Req.</b> |
|--------------|---------------|--------------|-----------|------------|------------|-----------------|------------------|
|              |               |              | coeff     | mm/day     | mm/dec     | mm/dec          | mm/dec           |
| <b>Sep</b>   | 2             | Init         | 0.77      | 3.7        | 22.2       | 21.6            | 0.0              |
| <b>Sep</b>   | 3             | Init         | 0.40      | 1.9        | 19.0       | 32.8            | 0.0              |
| <b>Oct</b>   | 1             | Init         | 0.40      | 1.9        | 18.7       | 30.1            | 0.0              |
| <b>Oct</b>   | 2             | Deve         | 0.43      | 2.0        | 19.7       | 28.1            | 0.0              |
| <b>Oct</b>   | 3             | Deve         | 0.57      | 2.4        | 26.8       | 21.0            | 5.8              |
| <b>Nov</b>   | 1             | Deve         | 0.71      | 2.9        | 28.7       | 12.2            | 16.5             |
| <b>Nov</b>   | 2             | Deve         | 0.85      | 3.2        | 31.9       | 5.1             | 26.8             |
| <b>Nov</b>   | 3             | Deve         | 0.99      | 3.6        | 36.0       | 3.6             | 32.4             |
| <b>Dec</b>   | 1             | Deve         | 1.13      | 3.9        | 39.0       | 1.7             | 37.3             |
| <b>Dec</b>   | 2             | Mid          | 1.23      | 4.1        | 40.7       | 0.0             | 40.7             |
| <b>Dec</b>   | 3             | Mid          | 1.24      | 4.4        | 48.1       | 0.0             | 48.0             |
| <b>Jan</b>   | 1             | Mid          | 1.24      | 4.7        | 47.0       | 0.0             | 46.9             |
| <b>Jan</b>   | 2             | Mid          | 1.24      | 4.9        | 49.4       | 0.0             | 49.4             |
| <b>Jan</b>   | 3             | Mid          | 1.24      | 5.3        | 58.5       | 0.1             | 58.4             |
| <b>Feb</b>   | 1             | Mid          | 1.24      | 5.7        | 56.9       | 1.1             | 55.9             |
| <b>Feb</b>   | 2             | Mid          | 1.24      | 6.1        | 60.7       | 1.6             | 59.1             |
| <b>Feb</b>   | 3             | Mid          | 1.24      | 6.5        | 51.9       | 1.2             | 50.7             |
| <b>Mar</b>   | 1             | Mid          | 1.24      | 6.9        | 69.2       | 0.5             | 68.7             |
| <b>Mar</b>   | 2             | Mid          | 1.24      | 7.4        | 73.5       | 0.1             | 73.4             |
| <b>Mar</b>   | 3             | Mid          | 1.24      | 7.7        | 84.1       | 1.1             | 83.1             |
| <b>Apr</b>   | 1             | Mid          | 1.24      | 8.0        | 79.5       | 1.4             | 78.0             |
| <b>Apr</b>   | 2             | Mid          | 1.24      | 8.3        | 82.5       | 1.9             | 80.6             |
| <b>Apr</b>   | 3             | Mid          | 1.24      | 8.8        | 87.8       | 5.6             | 82.1             |
| <b>May</b>   | 1             | Mid          | 1.24      | 9.5        | 94.7       | 9.9             | 84.8             |
| <b>May</b>   | 2             | Mid          | 1.24      | 10.1       | 100.8      | 13.3            | 87.5             |
| <b>May</b>   | 3             | Mid          | 1.24      | 9.7        | 106.6      | 15.9            | 90.7             |
| <b>Jun</b>   | 1             | Mid          | 1.24      | 9.2        | 92.1       | 18.5            | 73.6             |
| <b>Jun</b>   | 2             | Late         | 1.22      | 8.7        | 87.4       | 21.2            | 66.2             |
| <b>Jun</b>   | 3             | Late         | 1.16      | 7.8        | 78.2       | 23.5            | 54.6             |
| <b>Jul</b>   | 1             | Late         | 1.11      | 6.9        | 68.7       | 26.4            | 42.2             |
| <b>Jul</b>   | 2             | Late         | 1.06      | 6.0        | 60.1       | 29.1            | 31.0             |
| <b>Jul</b>   | 3             | Late         | 1.01      | 5.7        | 62.2       | 29.1            | 33.1             |
| <b>Aug</b>   | 1             | Late         | 0.96      | 5.3        | 53.4       | 28.4            | 24.9             |
| <b>Aug</b>   | 2             | Late         | 0.91      | 5.0        | 49.8       | 28.5            | 21.2             |
| <b>Aug</b>   | 3             | Late         | 0.86      | 4.5        | 49.5       | 30.4            | 19.1             |
| <b>Sep</b>   | 1             | Late         | 0.80      | 4.1        | 40.5       | 33.6            | 6.9              |
| <b>Sep</b>   | 2             | Late         | 0.77      | 3.7        | 14.8       | 14.4            | 0.0              |
| <b>Total</b> |               |              |           |            | 2090.2     | 492.9           | 1629.7           |

**Table S2** Irrigation Schedule for Sugarcane for Refill Soil at field capacity and irrigation at critical depletion

| <b>Date</b>       | <b>Day</b> | <b>Stage</b> | <b>Rain</b> | <b>Ks</b> | <b>Eta</b> | <b>Depl</b> | <b>Net<br/>Irr</b> | <b>Deficit</b> | <b>Loss</b> | <b>Gr.<br/>Irr</b> | <b>Flow</b> |
|-------------------|------------|--------------|-------------|-----------|------------|-------------|--------------------|----------------|-------------|--------------------|-------------|
|                   |            |              | mm          | fract.    | %          | %           | mm                 | mm             | mm          | mm                 | l/s/ha      |
| <b>16<br/>Jan</b> | 124        | Mid          | 0.0         | 1.00      | 100        | 65          | 284.8              | 0.0            | 0.0         | 406.9              | 0.38        |
| <b>6<br/>Mar</b>  | 173        | Mid          | 0.0         | 1.00      | 100        | 65          | 284.0              | 0.0            | 0.0         | 405.7              | 0.96        |
| <b>13<br/>Apr</b> | 211        | Mid          | 1.2         | 1.00      | 100        | 66          | 285.2              | 0.0            | 0.0         | 407.4              | 1.24        |
| <b>18<br/>May</b> | 246        | Mid          | 0.0         | 1.00      | 100        | 65          | 283.7              | 0.0            | 0.0         | 405.2              | 1.34        |
| <b>30<br/>Jun</b> | 289        | End          | 0.0         | 1.00      | 100        | 66          | 285.5              | 0.0            | 0.0         | 407.9              | 1.10        |
| <b>14<br/>Sep</b> | End        | End          | 0.0         | 1.00      | 0          | 27          |                    |                |             |                    |             |



**Table S3.** Crop Water Requirement for Maize

| <b>Month</b> | <b>Decade</b> | <b>Stage</b> | <b>Kc</b> | <b>ETc</b> | <b>ETc</b> | <b>Eff rain</b> | <b>Irr. Req.</b> |
|--------------|---------------|--------------|-----------|------------|------------|-----------------|------------------|
|              |               |              | coeff     | mm/day     | mm/dec     | mm/dec          | mm/dec           |
| <b>May</b>   | 1             | Init         | 0.30      | 2.3        | 9.2        | 3.9             | 4.3              |
| <b>May</b>   | 2             | Init         | 0.30      | 2.4        | 24.4       | 13.3            | 11.1             |
| <b>May</b>   | 3             | Deve         | 0.34      | 2.6        | 28.9       | 15.9            | 13.0             |
| <b>Jun</b>   | 1             | Deve         | 0.58      | 4.3        | 42.8       | 18.5            | 24.4             |
| <b>Jun</b>   | 2             | Deve         | 0.84      | 6.0        | 60.2       | 21.2            | 39.1             |
| <b>Jun</b>   | 3             | Deve         | 1.10      | 7.4        | 73.8       | 23.5            | 50.3             |
| <b>Jul</b>   | 1             | Mid          | 1.22      | 7.5        | 75.1       | 26.4            | 48.6             |
| <b>Jul</b>   | 2             | Mid          | 1.22      | 6.9        | 68.8       | 29.1            | 39.7             |
| <b>Jul</b>   | 3             | Mid          | 1.22      | 6.8        | 74.9       | 29.1            | 45.8             |
| <b>Aug</b>   | 1             | Late         | 1.22      | 6.8        | 67.6       | 28.4            | 39.2             |
| <b>Aug</b>   | 2             | Late         | 1.03      | 5.6        | 56.4       | 28.5            | 27.9             |
| <b>Aug</b>   | 3             | Late         | 0.73      | 3.8        | 42.0       | 30.4            | 11.6             |
| <b>Sep</b>   | 1             | Late         | 0.45      | 2.3        | 18.2       | 26.9            | 0.0              |
| <b>Total</b> |               |              |           |            | 642.4      | 295.2           | 354.9            |

**TableS4** Irrigation Schedule for Maize at Fixed application Depth of 55 mm and irrigation is at critical depletion

| <b>Date</b>   | <b>Day</b> | <b>Stage</b> | <b>Rain</b> | <b>Ks</b> | <b>Eta</b> | <b>Depl</b> | <b>Net Irr</b> | <b>Deficit</b> | <b>Loss</b> | <b>Gr. Irr</b> | <b>Flow</b> |
|---------------|------------|--------------|-------------|-----------|------------|-------------|----------------|----------------|-------------|----------------|-------------|
|               |            |              | mm          | fract.    | %          | %           | mm             | mm             | mm          | mm             | l/s/ha      |
| <b>22 Jun</b> | 47         | Dev          | 0.0         | 1.00      | 100        | 58          | 55.0           | 39.3           | 0.0         | 78.6           | 0.19        |
| <b>9 Jul</b>  | 64         | Mid          | 0.0         | 1.00      | 100        | 57          | 55.0           | 48.4           | 0.0         | 78.6           | 0.53        |
| <b>22 Jul</b> | 77         | Mid          | 0.0         | 1.00      | 100        | 57          | 55.0           | 46.9           | 0.0         | 78.6           | 0.70        |
| <b>10 Aug</b> | 96         | End          | 0.0         | 1.00      | 100        | 58          | 55.0           | 48.9           | 0.0         | 78.6           | 0.48        |
| <b>8 Sep</b>  | End        | End          | 0.0         | 1.00      | 100        | 26          |                |                |             |                |             |

**Table S5** Crop Water Requirement for Sorghum

| <b>Month</b> | <b>Decade</b> | <b>Stage</b> | <b>Kc</b><br>coeff | <b>ETc</b><br>mm/day | <b>ETc</b><br>mm/dec | <b>Eff rain</b><br>mm/dec | <b>Irr. Req.</b><br>mm/dec |
|--------------|---------------|--------------|--------------------|----------------------|----------------------|---------------------------|----------------------------|
| <b>Nov</b>   | 2             | Init         | 0.30               | 1.1                  | 11.2                 | 5.1                       | 6.1                        |
| <b>Nov</b>   | 3             | Deve         | 0.33               | 1.2                  | 11.8                 | 3.6                       | 8.2                        |
| <b>Dec</b>   | 1             | Deve         | 0.48               | 1.7                  | 16.5                 | 1.7                       | 14.8                       |
| <b>Dec</b>   | 2             | Deve         | 0.65               | 2.1                  | 21.4                 | 0.0                       | 21.4                       |
| <b>Dec</b>   | 3             | Deve         | 0.83               | 2.9                  | 32.2                 | 0.0                       | 32.2                       |
| <b>Jan</b>   | 1             | Mid          | 0.97               | 3.7                  | 36.9                 | 0.0                       | 36.9                       |
| <b>Jan</b>   | 2             | Mid          | 0.98               | 3.9                  | 39.3                 | 0.0                       | 39.3                       |
| <b>Jan</b>   | 3             | Mid          | 0.98               | 4.2                  | 46.5                 | 0.1                       | 46.4                       |
| <b>Feb</b>   | 1             | Late         | 0.94               | 4.3                  | 43.3                 | 1.1                       | 42.2                       |
| <b>Feb</b>   | 2             | Late         | 0.80               | 3.9                  | 39.1                 | 1.6                       | 37.5                       |
| <b>Feb</b>   | 3             | Late         | 0.66               | 3.5                  | 27.9                 | 1.2                       | 26.7                       |
| <b>Mar</b>   | 1             | Late         | 0.57               | 3.2                  | 15.9                 | 0.3                       | 15.6                       |
| <b>Total</b> |               |              |                    |                      | 348.0                | 20.7                      | 327.4                      |

**TableS6** Irrigation Schedule for Sorghum at Fixed application Depth of 50 mm and irrigation is at critical depletion

| <b>Date</b>   | <b>Day</b> | <b>Stage</b> | <b>Rain</b> | <b>Ks</b> | <b>Eta</b> | <b>Depl</b> | <b>Net<br/>Irr</b> | <b>Deficit</b> | <b>Loss</b> | <b>Gr.<br/>Irr</b> | <b>Flow</b> |
|---------------|------------|--------------|-------------|-----------|------------|-------------|--------------------|----------------|-------------|--------------------|-------------|
|               |            |              | mm          | fract.    | %          | %           | mm                 | mm             | mm          | mm                 | l/s/ha      |
| <b>12 Jan</b> | 68         | Mid          | 0.0         | 1.00      | 100        | 51          | 50.0               | 79.7           | 0.0         | 71.4               | 0.12        |
| <b>24 Jan</b> | 80         | Mid          | 0.0         | 1.00      | 100        | 51          | 50.0               | 78.0           | 0.0         | 71.4               | 0.69        |
| <b>7 Feb</b>  | 94         | End          | 0.7         | 1.00      | 100        | 54          | 50.0               | 86.5           | 0.0         | 71.4               | 0.59        |
| <b>5 Mar</b>  | End        | End          | 21.0        | 1.00      | 100        | 70          |                    |                |             |                    |             |

**TableS7** Crop Water Requirement for Sunflower

| <b>Month</b> | <b>Decade</b> | <b>Stage</b> | <b>Kc</b> | <b>ETc</b> | <b>ETc</b> | <b>Eff rain</b> | <b>Irr. Req.</b> |
|--------------|---------------|--------------|-----------|------------|------------|-----------------|------------------|
|              |               |              | coeff     | mm/day     | mm/dec     | mm/dec          | mm/dec           |
| <b>Jan</b>   | 3             | Init         | 0.35      | 1.5        | 6.0        | 0.0             | 6.0              |
| <b>Feb</b>   | 1             | Init         | 0.35      | 1.6        | 16.1       | 1.1             | 15.0             |
| <b>Feb</b>   | 2             | Init         | 0.35      | 1.7        | 17.2       | 1.6             | 15.6             |
| <b>Feb</b>   | 3             | Deve         | 0.43      | 2.3        | 18.0       | 1.2             | 16.8             |
| <b>Mar</b>   | 1             | Deve         | 0.63      | 3.5        | 35.3       | 0.5             | 34.7             |
| <b>Mar</b>   | 2             | Deve         | 0.86      | 5.1        | 50.8       | 0.1             | 50.7             |
| <b>Mar</b>   | 3             | Mid          | 1.08      | 6.7        | 73.4       | 1.1             | 72.3             |
| <b>Apr</b>   | 1             | Mid          | 1.14      | 7.3        | 73.0       | 1.4             | 71.5             |
| <b>Apr</b>   | 2             | Mid          | 1.14      | 7.6        | 75.7       | 1.9             | 73.8             |
| <b>Apr</b>   | 3             | Mid          | 1.14      | 8.1        | 80.6       | 5.6             | 75.0             |
| <b>May</b>   | 1             | Mid          | 1.14      | 8.7        | 86.9       | 9.9             | 77.1             |
| <b>May</b>   | 2             | Late         | 1.02      | 8.3        | 83.3       | 13.3            | 70.0             |
| <b>May</b>   | 3             | Late         | 0.70      | 5.5        | 59.9       | 15.9            | 44.0             |
| <b>Jun</b>   | 1             | Late         | 0.43      | 3.2        | 19.1       | 11.1            | 9.9              |
| <b>Total</b> |               |              |           |            | 695.3      | 64.7            | 632.4            |

**TableS8** Irrigation Schedule for Sunflower at Fixed application Depth of 50 mm and irrigation is fixed interval per stage

| <b>Date</b>   | <b>Day</b> | <b>Stage</b> | <b>Rain</b> | <b>Ks</b> | <b>Eta</b> | <b>Depl</b> | <b>Net<br/>Irr</b> | <b>Deficit</b> | <b>Loss</b> | <b>Gr.<br/>Irr</b> | <b>Flow</b> |
|---------------|------------|--------------|-------------|-----------|------------|-------------|--------------------|----------------|-------------|--------------------|-------------|
|               |            |              | mm          | fract.    | %          | %           | mm                 | mm             | mm          | mm                 | l/s/ha      |
| <b>21 Feb</b> | 25         | Init         | 0.0         | 1.00      | 100        | 30          | 50.0               | 0.0            | 11.9        | 71.4               | <b>0.33</b> |
| <b>28 Mar</b> | 60         | Dev          | 0.0         | 0.79      | 97         | 63          | 50.0               | 96.4           | 0.0         | 71.4               | <b>0.24</b> |
| <b>12 May</b> | 105        | Mid          | 0.0         | 0.14      | 41         | 93          | 50.0               | 168.8          | 0.0         | 71.4               | <b>0.18</b> |
| <b>6 Jun</b>  | End        | End          | 0.0         | 0.70      | 0          | 86          |                    |                |             |                    |             |

**Table S9: Crop Characteristics for Maize**

| Crop Characteristics                                                             | Parameter                                | Unit                     | Observation/Value/Remark |
|----------------------------------------------------------------------------------|------------------------------------------|--------------------------|--------------------------|
| Canopy Cover                                                                     | Growth of Initial Canopy                 | [-]                      | Very High Canopy Cover   |
|                                                                                  | Initial Canopy Cover (CC <sub>0</sub> )  | [-]                      | 1.00                     |
| Type of Planting Method: Transplantation                                         | Canopy Size                              | [cm <sup>2</sup> /plant] | 15.0                     |
|                                                                                  | Plant Density                            | [Plants/ha]              | 66,667                   |
| Canopy Development                                                               | Canopy Expansion                         | [-]                      | Fast Expansion           |
|                                                                                  | Maximum Canopy Cover (CC <sub>x</sub> )  | [%]                      | 90                       |
|                                                                                  | Canopy Decline                           | [-]                      | Slow decline             |
| Time to reach at different growth stages from sowing                             | Recovered                                | [days]                   | 6                        |
|                                                                                  | Maximum canopy                           | [days]                   | 54                       |
|                                                                                  | Senescence                               | [days]                   | 107                      |
|                                                                                  | Maturity                                 | [days]                   | 125                      |
| Flowering and Yield Formation                                                    | Length Building up HI                    | [days]                   | 54                       |
|                                                                                  | Duration of Flowering                    | [days]                   | 13                       |
| Time to reach at flowering, maturity and potential vegetative growth from sowing | Flowering                                | [days]                   | 66                       |
|                                                                                  | Maturity                                 | [days]                   | 125                      |
|                                                                                  | Potential Vegetative growth              | [days]                   | 72                       |
| Root Deepening: Deep Rooted Crop                                                 | Maximum effective rooting depth          | [m]                      | 2.0                      |
|                                                                                  | Average root zone expansion              | [cm/day]                 | 1.70                     |
|                                                                                  | From day 1 after sowing to maximum depth | [days]                   | 108                      |
| Crop Production (No Water, Fertility or Salinity Stress)                         | Type of Crop                             | [-]                      | C4                       |
|                                                                                  | WP*                                      | [Ton/ha]                 | 0.337                    |
|                                                                                  | Reference Harvest Index (HI)             | [%]                      | 48                       |
|                                                                                  | Biomass                                  | [Ton/ha]                 | 28.128                   |
|                                                                                  | Dry Yield                                | [Ton/ha]                 | 13.586                   |
|                                                                                  | ET water Productivity                    | [Kg/m <sup>3</sup> ]     | 2.41                     |
|                                                                                  | HI adjusted                              | [%]                      | 48.3                     |

**Table S10: Crop Characteristics for Sorghum**

| Crop Characteristics                                                             | Parameter                                | Unit                     | Observation/Value/Remark |
|----------------------------------------------------------------------------------|------------------------------------------|--------------------------|--------------------------|
| Canopy Cover                                                                     | Growth of Initial Canopy                 | [-]                      | Very High Canopy Cover   |
|                                                                                  | Initial Canopy Cover (CC <sub>o</sub> )  | [-]                      | 0.89                     |
| Type of Planting Method: Direct sowing                                           | Canopy Size                              | [cm <sup>2</sup> /plant] | 6.0                      |
|                                                                                  | Plant Density                            | [Plants/ha]              | 1,48,148                 |
| Canopy Development                                                               | Canopy Expansion                         | [-]                      | Fast Expansion           |
|                                                                                  | Maximum Canopy Cover (CC <sub>x</sub> )  | [%]                      | 90                       |
|                                                                                  | Canopy Decline                           | [-]                      | Slow decline             |
|                                                                                  |                                          |                          |                          |
| Time to reach at different growth stages from sowing                             | Emergence                                | [days]                   | 13                       |
|                                                                                  | Maximum canopy                           | [days]                   | 60                       |
|                                                                                  | Senescence                               | [days]                   | 91                       |
|                                                                                  | Maturity                                 | [days]                   | 102                      |
| Flowering and Yield Formation                                                    | Length Building up HI                    | [days]                   | 37                       |
|                                                                                  | Duration of Flowering                    | [days]                   | 20                       |
| Time to reach at flowering, maturity and potential vegetative growth from sowing | Flowering                                | [days]                   | 65                       |
|                                                                                  | Maturity                                 | [days]                   | 102                      |
|                                                                                  | Potential Vegetative growth              | [days]                   | 75                       |
| Root Deepening: medium-Deep Rooted Crop                                          | Maximum effective rooting depth          | [m]                      | 1.50                     |
|                                                                                  | Average root zone expansion              | [cm/day]                 | 1.40                     |
|                                                                                  | From day 1 after sowing to maximum depth | [days]                   | 96                       |
| Crop Production (No Water, Fertility or Salinity Stress)                         | Type of Crop                             | [-]                      | C4                       |
|                                                                                  | WP*                                      | [Ton/ha]                 | 0.337                    |
|                                                                                  | Reference Harvest Index (HI)             | [%]                      | 45                       |
|                                                                                  | Biomass                                  | [Ton/ha]                 | 6.571                    |
|                                                                                  | Dry Yield                                | [Ton/ha]                 | 0                        |
|                                                                                  | ET water Productivity                    | [Kg/m <sup>3</sup> ]     | 0                        |
|                                                                                  | HI adjusted                              | [%]                      | 0                        |



**Table S11: Crop Characteristics for Sugarcane**

| Crop Characteristics                                                             | Parameter                                | Unit                     | Observation/Value/Remark |
|----------------------------------------------------------------------------------|------------------------------------------|--------------------------|--------------------------|
| Canopy Cover                                                                     | Growth of Initial Canopy                 | [-]                      | Very High Canopy Cover   |
|                                                                                  | Initial Canopy Cover (CC <sub>o</sub> )  | [-]                      | 0.74                     |
| Type of Planting Method:<br>Transplantation                                      | Canopy Size                              | [cm <sup>2</sup> /plant] | 20                       |
|                                                                                  | Plant Density                            | [Plants/ha]              | 37,037                   |
| Canopy Development                                                               | Canopy Expansion                         | [-]                      | Fast Expansion           |
|                                                                                  | Maximum Canopy Cover (CC <sub>x</sub> )  | [%]                      | 90                       |
|                                                                                  | Canopy Decline                           | [-]                      | Very Slow decline        |
|                                                                                  |                                          |                          |                          |
| Time to reach at different growth stages from sowing                             | Recovered                                | [days]                   | 7                        |
|                                                                                  | Maximum canopy                           | [days]                   | 64                       |
|                                                                                  | Senescence                               | [days]                   | 330                      |
|                                                                                  | Maturity                                 | [days]                   | 365                      |
| Flowering and Yield Formation                                                    | Length Building up HI                    | [days]                   | NA                       |
|                                                                                  | Duration of Flowering                    | [days]                   | NA                       |
| Time to reach at flowering, maturity and potential vegetative growth from sowing | Flowering                                | [days]                   | 65                       |
|                                                                                  | Maturity                                 | [days]                   | 102                      |
|                                                                                  | Potential Vegetative growth              | [days]                   | 75                       |
| Root Deepening:<br>Very Deep-Rooted Crop                                         | Maximum effective rooting depth          | [m]                      | 3.00                     |
|                                                                                  | Average root zone expansion              | [cm/day]                 | 4.9                      |
|                                                                                  | From day 1 after sowing to maximum depth | [days]                   | 61                       |
| Crop Production (No Water, Fertility or Salinity Stress)                         | Type of Crop                             | [-]                      | C4                       |
|                                                                                  | WP*                                      | [Ton/ha]                 | 0.30                     |
|                                                                                  | Reference Harvest Index (HI)             | [%]                      | 35                       |
|                                                                                  | Biomass                                  | [Ton/ha]                 | 21.608                   |
|                                                                                  | Dry Yield                                | [Ton/ha]                 | 7.563                    |
|                                                                                  | ET water Productivity                    | [Kg/m <sup>3</sup> ]     | 2.29                     |
|                                                                                  | HI adjusted                              | [%]                      | NA                       |

**Table S12: Crop Characteristics for Sunflower**

| Crop Characteristics                                                             | Parameter                                | Unit                     | Observation/Value/Remark |
|----------------------------------------------------------------------------------|------------------------------------------|--------------------------|--------------------------|
| Canopy Cover                                                                     | Growth of Initial Canopy                 | [-]                      | Good Canopy Cover        |
|                                                                                  | Initial Canopy Cover (CC <sub>o</sub> )  | [-]                      | 0.43                     |
| Type of Planting Method: Direct sowing                                           | Canopy Size                              | [cm <sup>2</sup> /plant] | 6.0                      |
|                                                                                  | Plant Density                            | [Plants/ha]              | 71,429                   |
| Canopy Development                                                               | Canopy Expansion                         | [-]                      | Very Fast Expansion      |
|                                                                                  | Maximum Canopy Cover (CC <sub>x</sub> )  | [%]                      | 98                       |
|                                                                                  | Canopy Decline                           | [-]                      | Moderate decline         |
| Time to reach at different growth stages from sowing                             | Emergence                                | [days]                   | 18                       |
|                                                                                  | Maximum canopy                           | [days]                   | 56                       |
|                                                                                  | Senescence                               | [days]                   | 105                      |
|                                                                                  | Maturity                                 | [days]                   | 127                      |
| Flowering and Yield Formation                                                    | Length Building up HI                    | [days]                   | 47                       |
|                                                                                  | Duration of Flowering                    | [days]                   | 16                       |
| Time to reach at flowering, maturity and potential vegetative growth from sowing | Flowering                                | [days]                   | 78                       |
|                                                                                  | Maturity                                 | [days]                   | 127                      |
|                                                                                  | Potential Vegetative growth              | [days]                   | 85                       |
| Root Deepening: Deep-Rooted Crop                                                 | Maximum effective rooting depth          | [m]                      | 2.00                     |
|                                                                                  | Average root zone expansion              | [cm/day]                 | 2                        |
|                                                                                  | From day 1 after sowing to maximum depth | [days]                   | 100                      |
| Crop Production (No Water, Fertility or Salinity Stress)                         | Type of Crop                             | [-]                      | C3                       |
|                                                                                  | WP*                                      | [Ton/ha]                 | 0.18                     |
|                                                                                  | Reference Harvest Index (HI)             | [%]                      | 35                       |
|                                                                                  | Biomass                                  | [Ton/ha]                 | 10.933                   |
|                                                                                  | Dry Yield                                | [Ton/ha]                 | 3.560                    |
|                                                                                  | ET water Productivity                    | [Kg/m <sup>3</sup> ]     | 0.66                     |
|                                                                                  | HI adjusted                              | [%]                      | 32.6                     |

**Table S13** Furrow Irrigation Design Parameters for Maize

| <b>Furrow Irrigation Design Parameters</b>        |                       |            |              |                 |
|---------------------------------------------------|-----------------------|------------|--------------|-----------------|
| <b>Infiltration Method: Modified SCS Families</b> |                       |            |              |                 |
| <b>Operation Mode</b>                             |                       | Fixed Flow | Cutback Flow | Tailwater Reuse |
| Input parameters                                  | Units                 |            |              |                 |
| Flow rate                                         | [l/s]                 | 1.9        | 1.9          | 1.9             |
| Length                                            | [m]                   | 590        | 590          | 590             |
| Cutoff time                                       | [min]                 | 1185       | 1254         | 1254            |
| Cut-back ratio                                    | [-]                   |            | 0.67         |                 |
| Recovery ratio                                    | [-]                   |            |              | 0.85            |
| Required depth                                    | [mm]                  | 220        | 220          | 220             |
| Flow resistance                                   | [s/m <sup>1/3</sup> ] | 0.03       | 0.03         | 0.03            |
| Slope                                             | [m/m]                 | 0.02       | 0.02         | 0.02            |
| Spacing                                           | [m]                   | 0.75       | 0.75         | 0.75            |
| Maximum Velocity                                  | [m/min]               | 12.6       | 12.6         | 12.6            |
| Side Slope                                        | [m/m]                 | 1.2        | 1.0          | 1.0             |
| Bed Width                                         | [m]                   | 0.2        | 0.2          | 0.2             |
| SCS #                                             |                       | 0.6        | 0.6          | 0.6             |
| Output parameters                                 | Units                 |            |              |                 |
| Cutback flow                                      | [l/s]                 |            | 1.27         |                 |
| Advance ratio                                     | [-]                   |            | 0.14         |                 |
| Application efficiency                            | [%]                   | 71.8       | 94.1         | 94.5            |
| Storage efficiency                                | [%]                   | 99.7       | 98.7         | 98.9            |
| Uniformity coefficient                            | [%]                   | 96.8       | 97.7         | 97.8            |
| Distribution uniformity                           | [%]                   | 91.3       | 94           | 94.2            |
| Deep percolation ratio                            | [%]                   | 3.9        | 1            | 0.7             |
| Runoff Ratio                                      | [%]                   | 24.2       | 5            | 31.9            |
| Average applied depth                             | [mm]                  | 231        | 219          | 220             |
| Minimum infiltrated depth                         | [mm]                  | 211        | 206          | 207             |
| Maximum infiltrated depth                         | [mm]                  | 239        | 225          | 225             |
| Surface runoff                                    | [mm]                  | 74         | 11           | 103             |
| Over irrigation depth                             | [mm]                  | 14         | 4            | 4               |
| Under irrigation depth                            | [mm]                  | 4          | 6            | 6               |
| Over irrigation length                            | [m]                   | 492        | 320          | 344             |
| Under irrigation length                           | [m]                   | 98         | 270          | 246             |
| Advance time                                      | [min]                 | 235        | 170          | 170             |
| Depletion time                                    | [min]                 | 1192       | 1258         | 1260            |
| Recession time                                    | [min]                 | 1254       | 1297         | 1303            |
| Opportunity time                                  | [min]                 | 1019       | 1127         | 1133            |
| No. of furrows                                    |                       | 2          | 2            | 2               |

**Table S14** Furrow Irrigation Design Parameters for Sorghum

| <b>Furrow Irrigation Design Parameters</b>        |                       |            |              |                 |
|---------------------------------------------------|-----------------------|------------|--------------|-----------------|
| <b>Infiltration Method: Modified SCS Families</b> |                       |            |              |                 |
| <b>Operation Mode</b>                             |                       | Fixed Flow | Cutback Flow | Tailwater Reuse |
| Input parameters                                  | Units                 |            |              |                 |
| Flow rate                                         | [l/s]                 | 1.4        | 1.4          | 1.4             |
| Length                                            | [m]                   | 570        | 570          | 570             |
| Cutoff time                                       | [min]                 | 1265       | 1265         | 1265            |
| Cut-back ratio                                    | [-]                   |            | 0.8          |                 |
| Recovery ratio                                    | [-]                   |            |              | 0.85            |
| Required depth                                    | [mm]                  | 150        | 150          | 150             |
| Flow resistance                                   | [s/m <sup>1/3</sup> ] | 0.03       | 0.03         | 0.03            |
| Slope                                             | [m/m]                 | 0.02       | 0.02         | 0.02            |
| Spacing                                           | [m]                   | 0.75       | 0.75         | 0.75            |
| Maximum Velocity                                  | [m/min]               | 12.6       | 12.6         | 12.6            |
| Side Slope                                        | [m/m]                 | 1.5        | 1.5          | 1.5             |
| Bed Width                                         | [m]                   | 0.2        | 0.2          | 0.2             |
| SCS #                                             |                       | 0.6        | 0.6          | 0.6             |
| Output parameters                                 | Units                 |            |              |                 |
| Cutback flow                                      | [l/s]                 |            | 1.12         |                 |
| Advance ratio                                     | [-]                   |            | 0.23         |                 |
| Application efficiency                            | [%]                   | 78.9       | 93.3         | 95.5            |
| Storage efficiency                                | [%]                   | 98.1       | 98           | 98.1            |
| Uniformity coefficient                            | [%]                   | 95.8       | 95.7         | 95.8            |
| Distribution uniformity                           | [%]                   | 88.4       | 88.3         | 88.4            |
| Deep percolation ratio                            | [%]                   | 1.6        | 1.8          | 1.6             |
| Runoff Ratio                                      | [%]                   | 19.5       | 4.9          | 19.5            |
| Average applied depth                             | [mm]                  | 150        | 150          | 150             |
| Minimum infiltrated depth                         | [mm]                  | 133        | 132          | 133             |
| Maximum infiltrated depth                         | [mm]                  | 157        | 157          | 157             |
| Surface runoff                                    | [mm]                  | 36         | 8            | 36              |
| Over irrigation depth                             | [mm]                  | 5          | 5            | 5               |
| Under irrigation depth                            | [mm]                  | 7          | 8            | 7               |
| Over irrigation length                            | [m]                   | 333        | 333          | 333             |
| Under irrigation length                           | [m]                   | 238        | 238          | 238             |
| Advance time                                      | [min]                 | 286        | 286          | 286             |
| Depletion time                                    | [min]                 | 1271       | 1270         | 1271            |
| Recession time                                    | [min]                 | 1314       | 1310         | 1314            |
| Opportunity time                                  | [min]                 | 1028       | 1024         | 1028            |
| No. of Furrows                                    |                       | 2          | 2            | 2               |

**Table S15** Furrow Irrigation Design Parameters for Sunflower

| <b>Furrow Irrigation Design Parameters</b>        |                       |                   |                     |                        |
|---------------------------------------------------|-----------------------|-------------------|---------------------|------------------------|
| <b>Infiltration Method: Modified SCS Families</b> |                       |                   |                     |                        |
| <b>Operation Mode</b>                             |                       | <b>Fixed Flow</b> | <b>Cutback Flow</b> | <b>Tailwater Reuse</b> |
| Input parameters                                  | Units                 |                   |                     |                        |
| Flow rate                                         | [l/s]                 | 0.75              | 0.75                | 0.75                   |
| Length                                            | [m]                   | 285               | 285                 | 285                    |
| Cutoff time                                       | [min]                 | 1000              | 1000                | 1000                   |
| Cut-back ratio                                    | [-]                   |                   | 0.75                |                        |
| Recovery ratio                                    | [-]                   |                   |                     | 0.85                   |
| Required depth                                    | [mm]                  | 150               | 150                 | 150                    |
| Flow resistance                                   | [s/m <sup>1/3</sup> ] | 0.04              | 0.04                | 0.04                   |
| Slope                                             | [m/m]                 | 0.005             | 0.005               | 0.005                  |
| Spacing                                           | [m]                   | 0.75              | 0.75                | 0.75                   |
| Maximum Velocity                                  | [m/min]               | 13.8              | 13.8                | 13.8                   |
| Side Slope                                        | [m/m]                 | 1                 | 1                   | 1                      |
| Bed Width                                         | [m]                   | 0.2               | 0.2                 | 0.2                    |
| SCS #                                             |                       | 0.6               | 0.6                 | 0.6                    |
| Output parameters                                 | Units                 |                   |                     |                        |
| Cutback flow                                      | [l/s]                 |                   | 0.56                |                        |
| Advance ratio                                     | [-]                   |                   | 0.26                |                        |
| Application efficiency                            | [%]                   | 75.5              | 92.5                | 91.6                   |
| Storage efficiency                                | [%]                   | 99.3              | 99.2                | 99.3                   |
| Uniformity coefficient                            | [%]                   | 95.4              | 95.3                | 95.4                   |
| Distribution uniformity                           | [%]                   | 87.6              | 87.3                | 87.6                   |
| Deep percolation ratio                            | [%]                   | 5.4               | 6.6                 | 5.5                    |
| Runoff Ratio                                      | [%]                   | 19                | 0.9                 | 19                     |
| Average applied depth                             | [mm]                  | 160               | 159                 | 160                    |
| Minimum infiltrated depth                         | [mm]                  | 140               | 139                 | 140                    |
| Maximum infiltrated depth                         | [mm]                  | 168               | 168                 | 168                    |
| Surface runoff                                    | [mm]                  | 38                | 1                   | 38                     |
| Over irrigation depth                             | [mm]                  | 13                | 13                  | 13                     |
| Under irrigation depth                            | [mm]                  | 4                 | 5                   | 4                      |
| Over irrigation length                            | [m]                   | 226               | 226                 | 226                    |
| Under irrigation length                           | [m]                   | 59                | 59                  | 59                     |
| Advance time                                      | [min]                 | 261               | 261                 | 261                    |
| Depletion time                                    | [min]                 | 1007              | 1006                | 1007                   |
| Recession time                                    | [min]                 | 1057              | 1051                | 1057                   |
| Opportunity time                                  | [min]                 | 796               | 790                 | 796                    |
| No. of Furrows                                    |                       | 1                 | 1                   | 1                      |
